# Supplementary material for: Persistence and Transmission Dynamics of mcr-1 and mcr-9 in Enterobacteriaceae from Pig Farms in Fujian, China after the Colistin Ban
Source: Research Square preprint supplement (doi:10.21203/rs.3.rs-6934660/v1), 2025-06-26

Table S1. PCR primers sequence sand expected product of gene segments

| Target genes | primer sequence | PCR product size/bp |
| --- | --- | --- |
| *mcr-1* | 5'-TCGCGGCATTCGTTATA-3' | 569 |
| 5'-GGTGGCGTTCAGCAGTC-3' |
| *mcr-2* | 5'-CAAGTGTGTTGGTCGCATTT-3' | 715 |
| 5'-TCTAGCCCAACAAGCATACC-3' |
| *mcr-3* | 5'-AAATAAAAATTGTTCCGCTTATG-3' | 992 |
| 5'-AATGGAGATCCCCGTTTTT-3' |
| *mcr-4* | 5'-TCACTTTCATCACTGCGTTG-3' | 1116 |
| 5'-TTGGTCCATGACTACCAATG-3' |
| *mcr-5* | 5'-ATGCGGTTGTCTGCATTTAT-3' | 1644 |
| 5'-TCATTGTGGTTGTCCTTTTCTG-3' |
| *mcr-6* | 5'-AGCTATGTCAATCCCGTGAT-3' | 252 |
| 5'-ATTGGCTAGGTTGTCAATC-3' |
| *mcr-7* | 5'-GCCCTTCTTTTCGTTGTT-3' | 551 |
| 5'-GGTTGGTCTCTTTCTCGT-3' |
| *mcr-8* | 5'-AACCGCCAGAGCACAGAATT-3' | 856 |
| 5'-TTCCCCCAGCGATTCTCCAT-3' |
| *mcr-9* | 5'-TTCCCTTTGTTCTGGTTG-3' | 1011 |
| 5'-GCAGGTAATAAGTCGGTC-3' |
| *mcr-10* | 5'-GGACCGACCTATTACCAGCG-3' | 366 |
| 5'-CAGCTTTGGTTGAACATTTACGAA-3' |
| ERIC-PCR for *K. pneumoniae* | 5’-ATGTAAGCTCCTGGGGATTCA-3' | / |
| 5’-AAGTAAGTGACTGGGGTGAGCG-3' |
| ERIC-PCR for *E. coli* | 5’-ATGTAAGCTCCTGGGGATTCAC-3’ | / |
| 5’-AAGTAAGTACTGGGGTGAGCG-3’ |

Table S2. The information of four *mcr-1* strains isolated from clinical samples.

|  | Age  (yrs)/sex | Specimen | Organism | ward | Underlying disease | | Collecting time | AMR profile |
| --- | --- | --- | --- | --- | --- | --- | --- | --- |
| Y19 | 51/M | Biliary tract | 1. *pneumoniae* | General surgery | BTI | 2017 | | AMP-SAM-ATM-CIP-CFX-CRO-CFZ-FEP-GEN-IPM-LEV-MEM-PRL-CZR-CXA-SXT-TZP-CL |
| Y27 | -/Male | wound | *E.coli* | ER | - | 2018 | | AMP-SAM-AMK-ATM-CIP-CFX-CRO-CFZ-FEP-GEN-IPM-LEV-MEM-PRL-CZR-CXA-SXT-CAZ-TOB-TZP-CL |
| Y46 | 79/F | Bile | *K.pneumoniae* | General surgery | Choledocholithiasis | 2019 | | AMP-SAM-ATM-CIP-CFX-CRO-CFZ-IMP-FEP-LEV-CAZ-TZP-CFP/SBT-CL |
| Y51 | 72/M | Bronchial brushing | 1. pneumoniae | ICU | Bronchopleural fistula | 2017 | | AMP-SAM-AMK-ATM-CRO-CFZ-FEP-IPM-LEV-MEM-GEN-PRL-CFX-SXT-CAZ-TOB-TZP-CIP-CZR-CXA-CL |

BTI:biliary tract infection;ER:emergency room

Table S3. The dectection ration of *mcr*-positive strains isolated from four pig farms in Fujian Province, China.

| Source of isolation | Total positive/total isolates (%) | Farm 1  Positive/total isolates (%) | Farm 2  Positive/total isolates (%) | Farm 3  Positive/total isolates (%) | Farm 4  Positive/total isolates (%) |
| --- | --- | --- | --- | --- | --- |
| *Escherichia coli* | | | | | |
| PF | 10/354（2.8） | 2/64（3.1） | 8/100（8） | 0/98（0） | 0/92（0） |
| EO | 1/42（2.4） | 0/12（0） | 1/5（20） | 0/5（0） | 0/20（0） |
| EI | 1/101（1.0） | 0/30（0） | 0/5（0） | 0/20（0） | 1/46（2.2） |
| FF | 2/24 (8.3) | 1/5（20） | 1/6（16.7） | 0/4（0） | 0/9（0） |
| Total | 14/521（2.7） | 3/111（2.7） | 10/116（8.6） | 0/127（0） | 1/167（0.6） |
| *Klebsiella pneumoniae* | | | | | |
| PF | 30/127(23.6) | 6/29 (20.7) | 11/46 (23.9) | 1/16 (6.3) | 12/36 (33.3) |
| EO | 7/32(21.9) | 3/9 (33.3) | 1/6 (16.7) | 2/6(33.3) | 1/11(9.1) |
| EI | 19/88(21.6) | 5/22 (22.7) | 2/9 (22.2) | 11/29(37.9) | 1/28(3.6) |
| FF | 4/16(25) | 1/6 (16.7) | 0/4(0) | 3/6（50) | 0 |
| Total | 60/263(22.8) | 15/66 (22.7) | 14/65 (21.5) | 17/57(29.83) | 14/75 (18.7) |

PF, pig feaces, EO, environmental samples outside the farms, EI, environmental samples inside the farms and FF, farm worker feaces

Figure S1


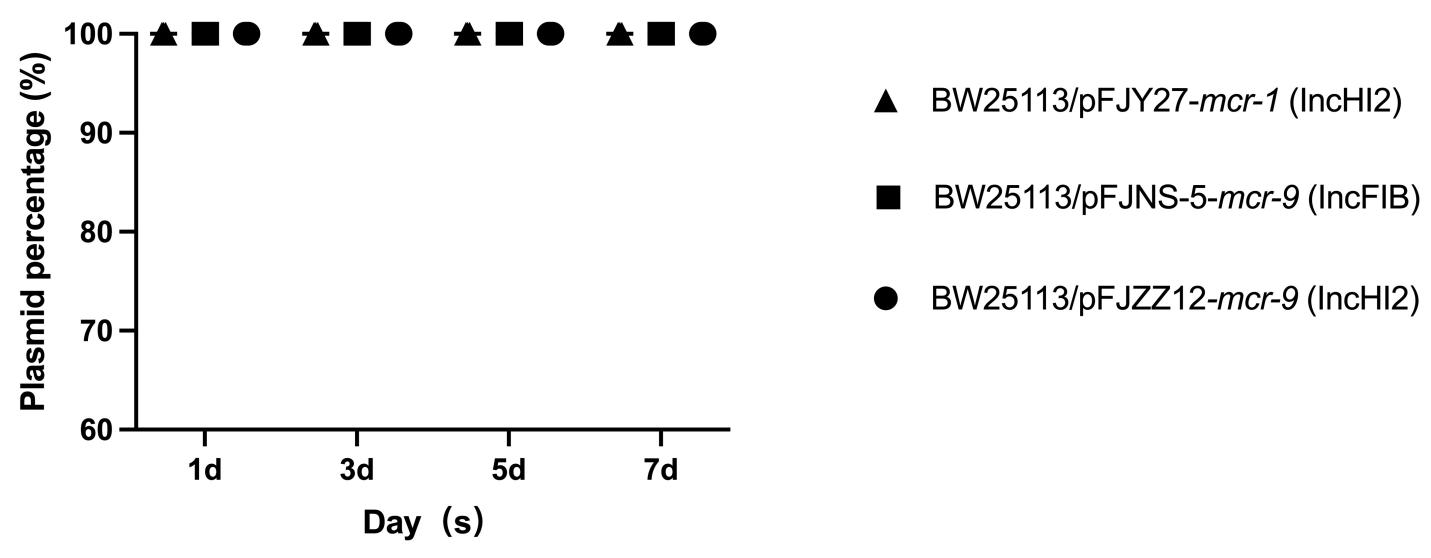

Supplement: Supplementary file 1 [file 81cb4b8449e1f7a67e83dd84.docx]
